# Supplementary material for: Joint Degeneration in a Mouse Model of Pseudoachondroplasia: ER Stress, Inflammation, and Block of Autophagy
Source: MDPI journal article supplement (doi:10.3390/ijms22179239), 2021-08-26
Supplement: s1 [file s1]

**Supplemental Figure S1.** Absence of mutant-COMP expression correlates with no articular chondrocyte stress in MT-COMP mice.

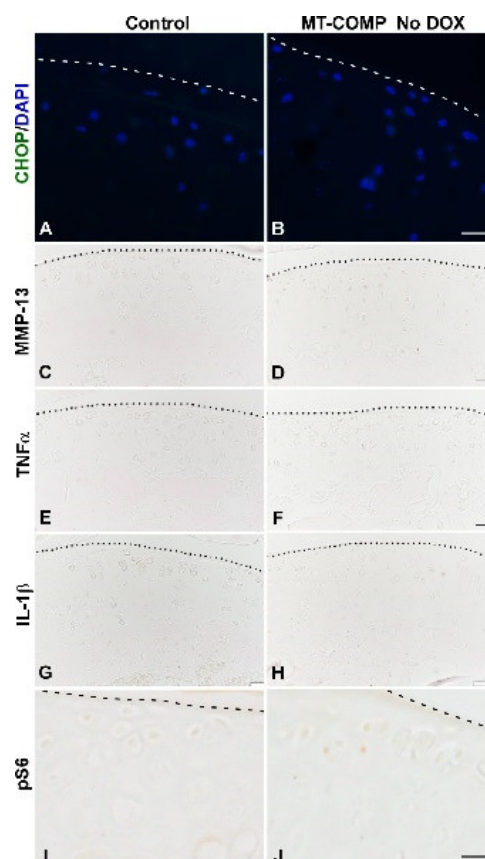

**Supplemental Figure S1.** Absence of mutant-COMP expression correlates with no articular chondrocyte stress in MT-COMP mice. Dotted line marks the edge of articular cartilage. Articular cartilage from control and MT-COMP mice with no DOX at 20 weeks were immunostained for CHOP (green, **A, B**) and DAPI (blue nuclei, **A, B**) or MMP13 (brown **C, D**) or TNF $\alpha$  (brown **E, F**) or IL-1 $\beta$  (brown **G, H**) or pS6 (brown **I, J**). ER stress (CHOP), degradative enzyme (MMP13), inflammation (TNF $\alpha$  or IL-1 $\beta$ ), and block of autophagy (pS6) were not detected in either MT-COMP or control articular chondrocytes in the absence of DOX that induce mutant-COMP expression. Bar = 100  $\mu$ m.
